# Supplementary material for: Transcriptional analysis of primary ciliary dyskinesia airway cells reveals a dedicated cilia glutathione pathway
Source: PubMed Central journal article supplement (PMC11385084; doi:10.1172/jci.insight.180198), 2024-07-23
Supplement: jciinsight-9-180198-s200.pdf [file jciinsight-9-180198-s200.pdf]

Full unedited gel for Figure 6C

NRF2 lane

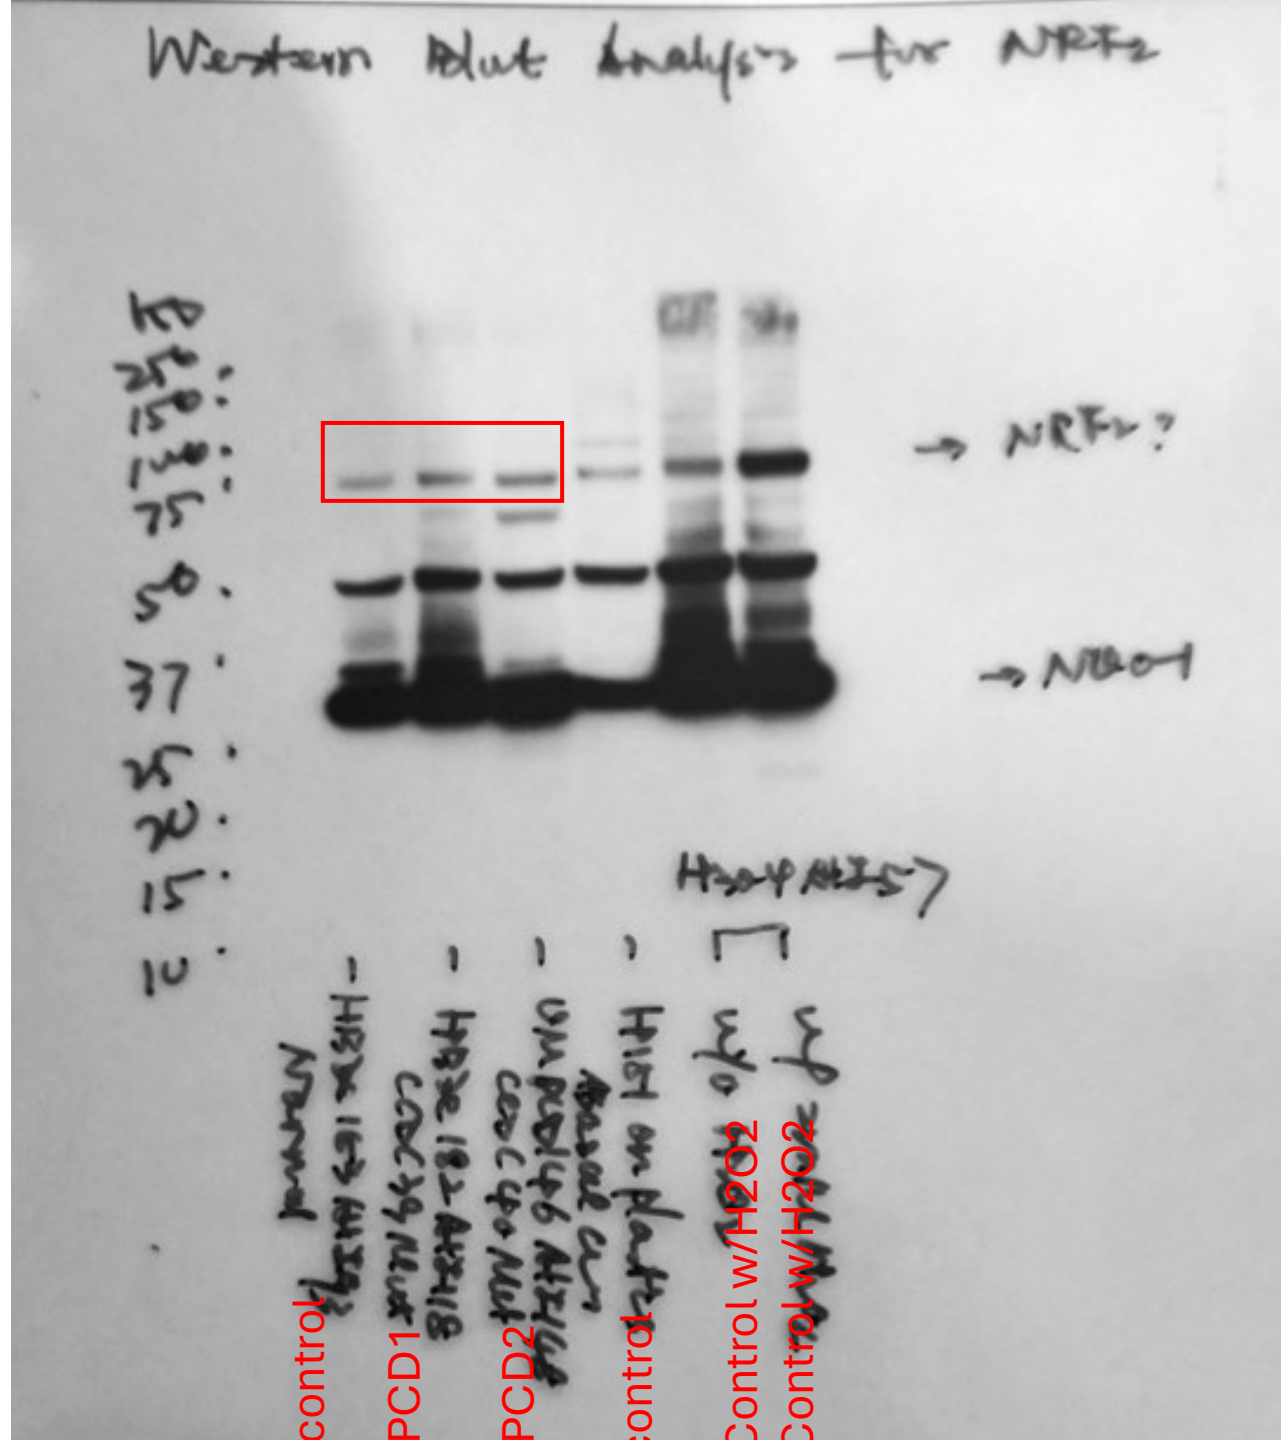





Full unedited gel for Figure 6C

NQO1 lane

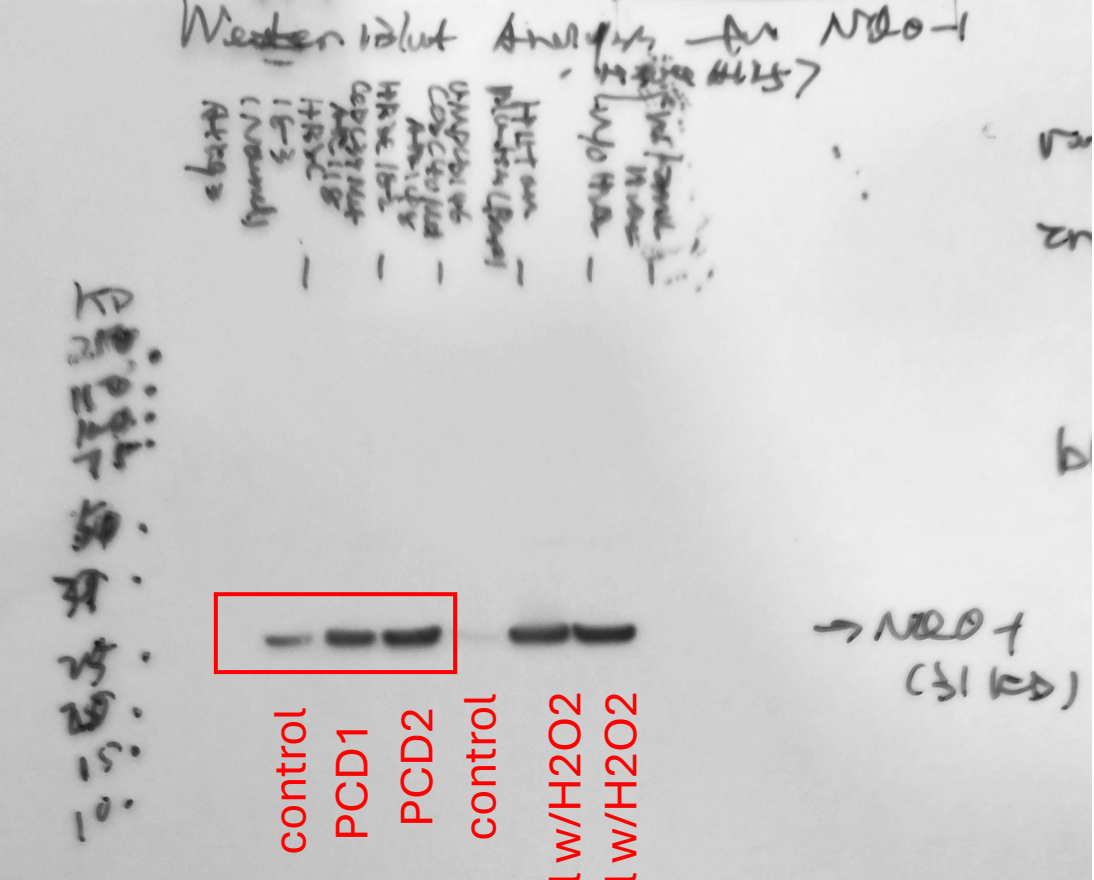

Full unedited gel for Figure 6C

Actin lane

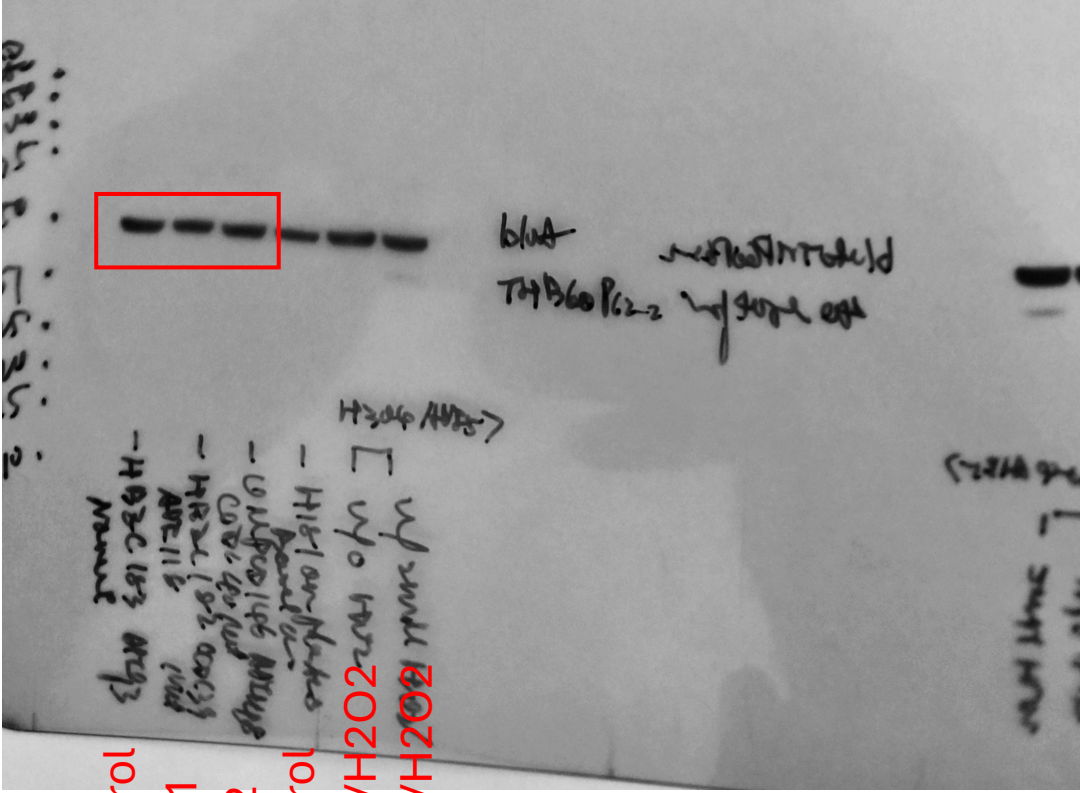

control  
PCD1  
PCD2  
control  
Control w/H2O2  
Control w/H2O2

Full unedited gel for Figure 6C

Ac-TUB lane

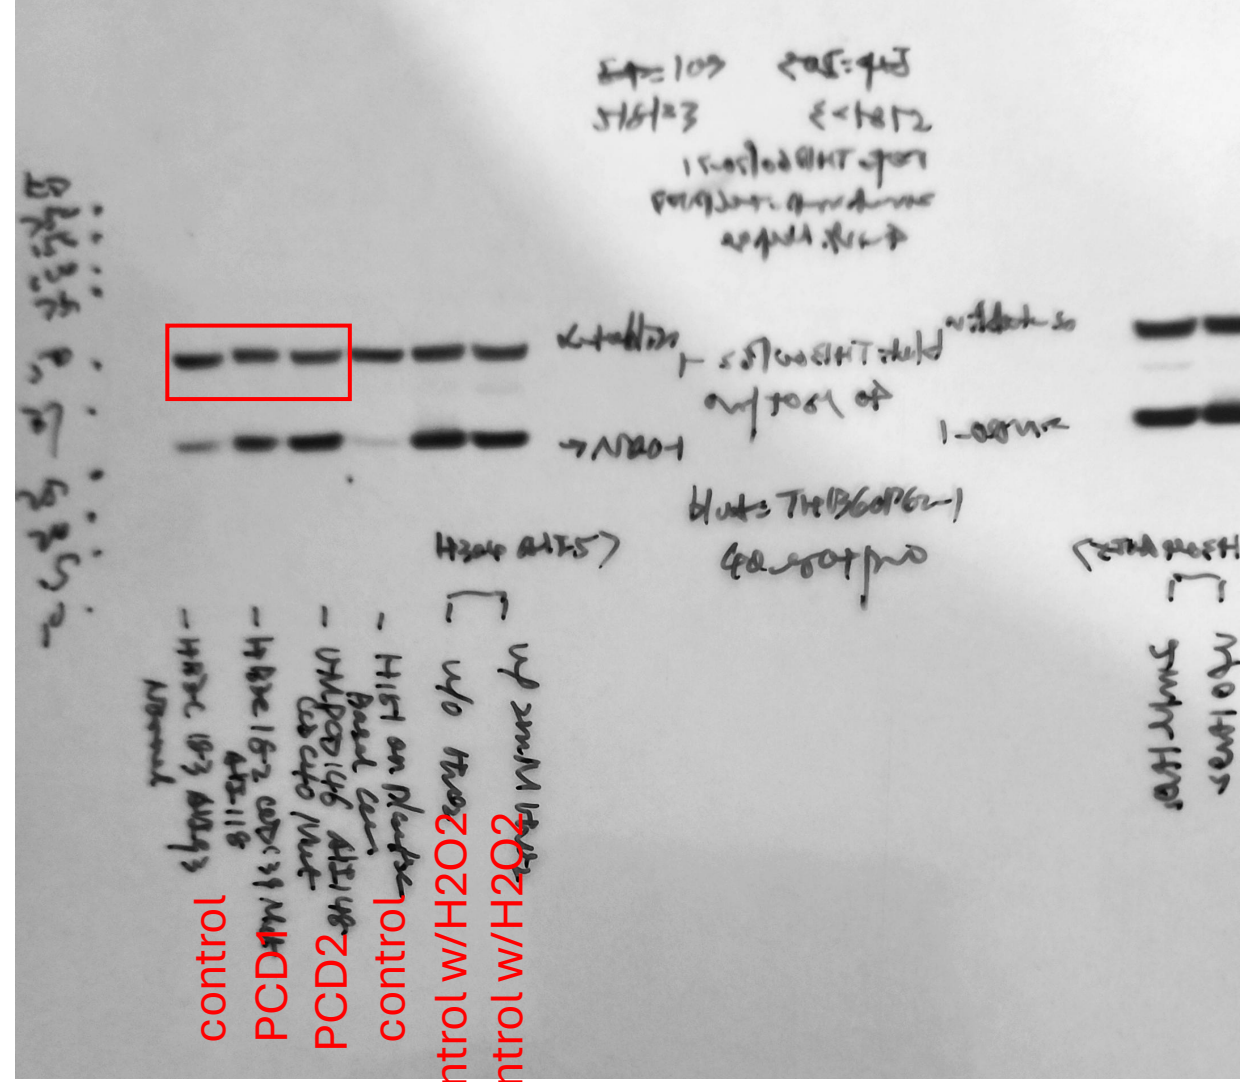

Full unedited gel for Figure 7E

**GSTA2** lane

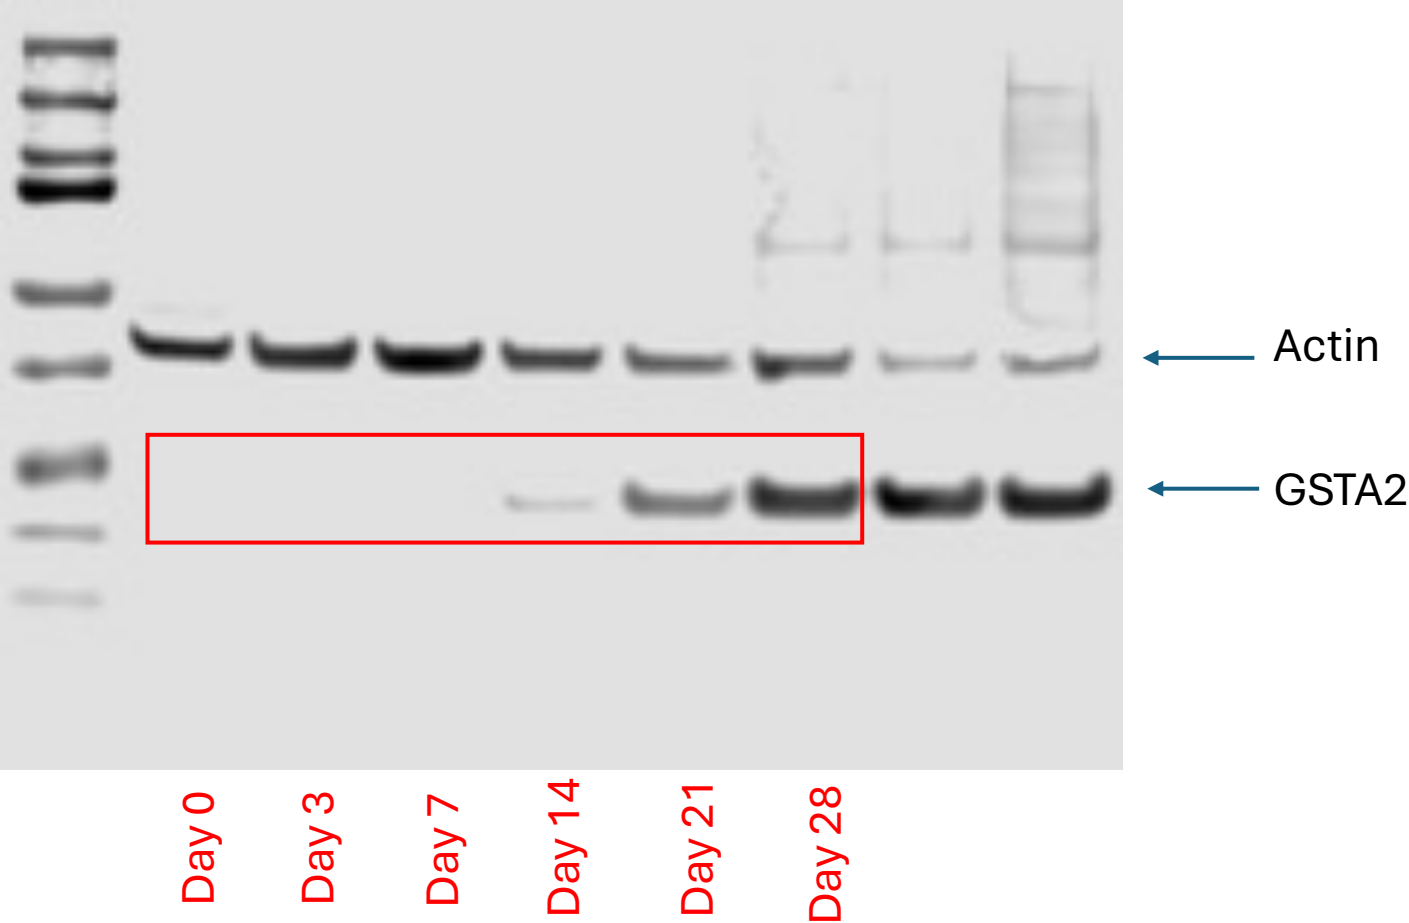

Full unedited gel for Figure 7E

**GSTA1** lane

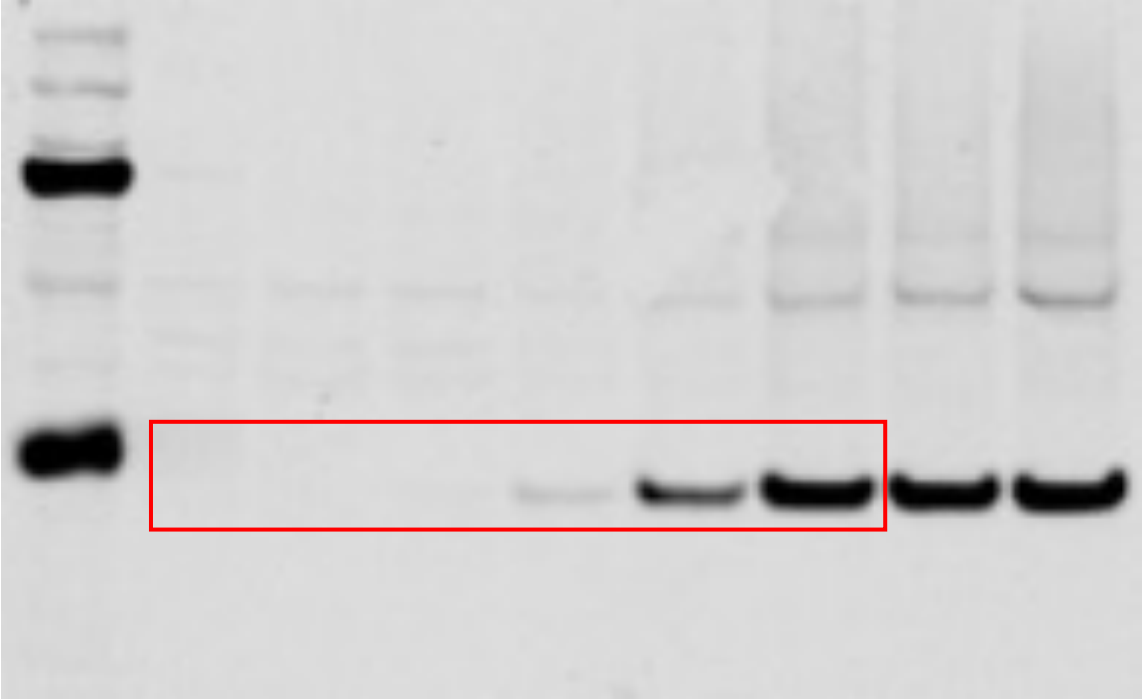

← GSTA1

Day 0

Day 3

Day 7

Day 14

Day 21

Day 28



Full unedited gel for Figure 7E

**ac-TUB** lane

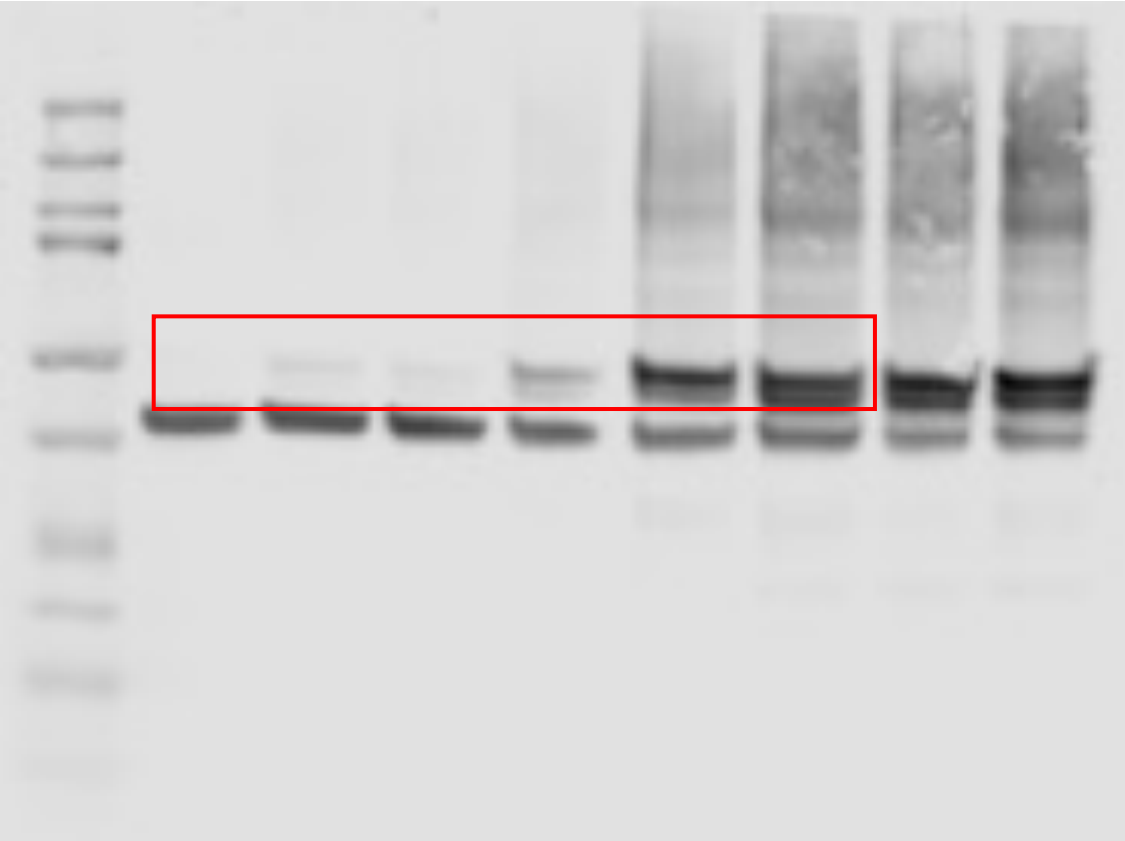

Day 0

Day 3

Day 7

Day 14

Day 21

Day 28

Ac-TUB

actin

Full unedited gel for Figure 7E

**actin** lane

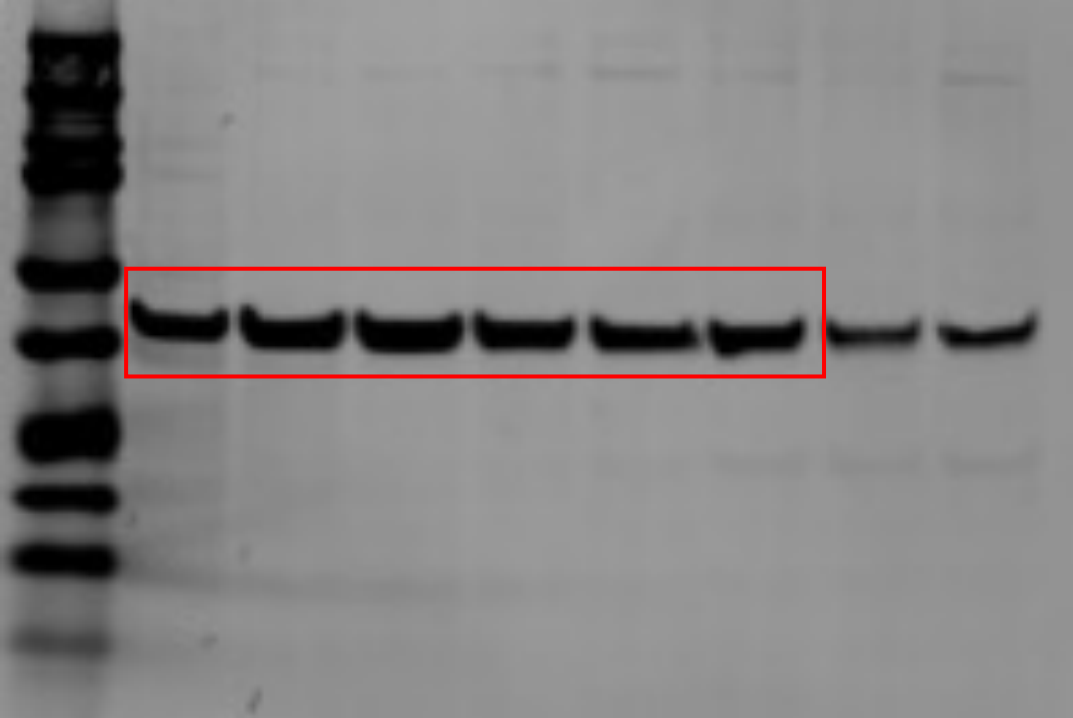

Day 0

Day 3

Day 7

Day 14

Day 21

Day 28

Day 35

Day 42
